# Supplementary material
Source: publisher figshare collection journal article supplement (https://acs.figshare.com/ndownloader/files/4120633)

Supporting Information for

Inhibition of Uranium(VI) Sorption on  
Titanium Dioxide by Surface Iron(III) Species  
in Ferric Oxide/Titanium Dioxide Systems

*M. Josick Comarmond<sup>\*1</sup>, Timothy E. Payne<sup>1</sup>, Richard N. Collins<sup>2</sup>, Gabriel Palmer<sup>3</sup>,  
Gregory R. Lumpkin<sup>1</sup> and Michael J. Angove<sup>3</sup>*

<sup>1</sup>Australian Nuclear Science and Technology Organisation, Locked Bag 2001,  
Kirrawee DC, NSW 2232, Australia

<sup>2</sup>School of Civil and Environmental Engineering, University of New South Wales,  
Sydney, NSW 2052, Australia

<sup>3</sup>School of Pharmacy and Applied Science, La Trobe University, P.O. Box 199,  
Bendigo, Victoria 3552, Australia

\*Corresponding author contact details: [josick.comarmond@ansto.gov.au](mailto:josick.comarmond@ansto.gov.au); T: +61 2  
9717 9453; F: +61 2 9717 9286.

(6 pages, 6 Figures)

**Figure S1. Sequential extraction results for Fe(III) (oxyhydr)oxide/TiO<sub>2</sub> binary systems. TAO represents the amorphous Fe(III) oxide content as determined from a Tamm's acid oxalate (TAO) extraction whereas CDB represents the quantity of crystalline Fe(III) (oxyhydr)oxides as determined from a citrate-dithionite-bicarbonate (CDB) extraction. The extractions were performed on solids after a U(VI) sorption experiment at pH 5.25.**

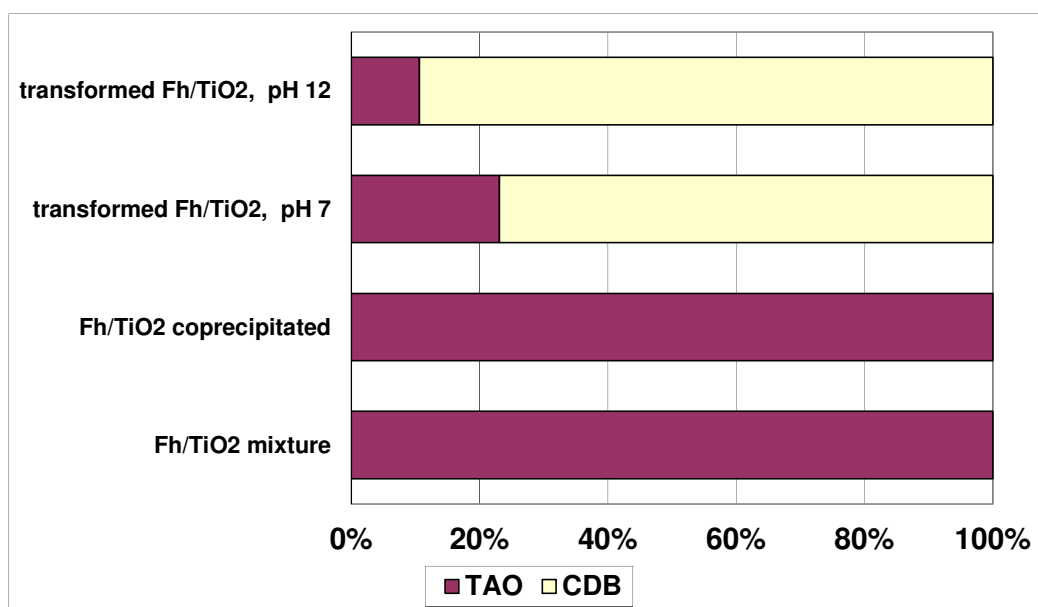

**Figure S2a. TEM image for the Fh/TiO<sub>2</sub> co-precipitated mixture after completion of a sorption experiment at pH 5.5. At this pH, no dissolution of Fh is expected.**

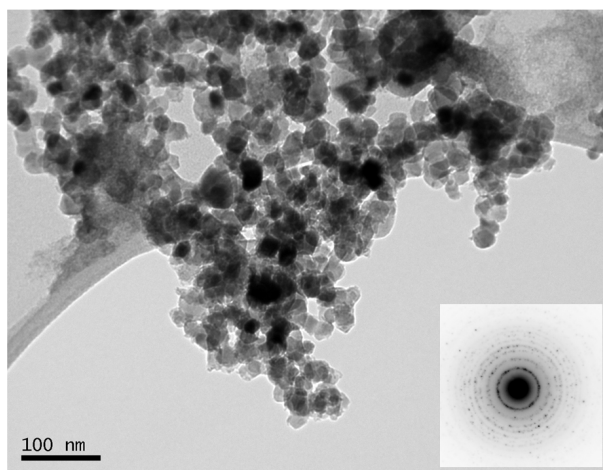

**Figure S2b. TEM image for the Fh/TiO<sub>2</sub> physical mixture after completion of a sorption experiment at pH 5.5. At this pH, no dissolution of Fh is expected.**

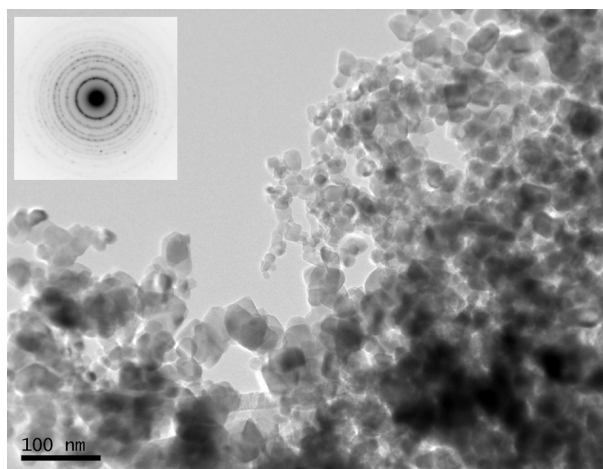

**Figure S2c. TEM image for the transformed Fh/TiO<sub>2</sub> co-precipitated mixture where this mixture was aged for one week at pH 12 and 70 °C.**

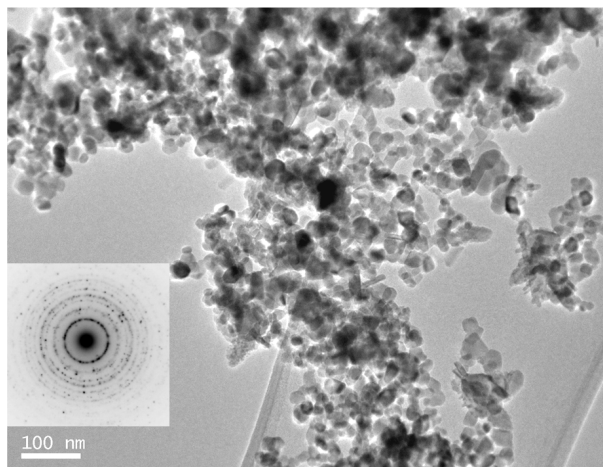

**Figure S3. X-ray diffractograms of the Fe(III) (oxyhydr)oxide/TiO<sub>2</sub> binary systems.**

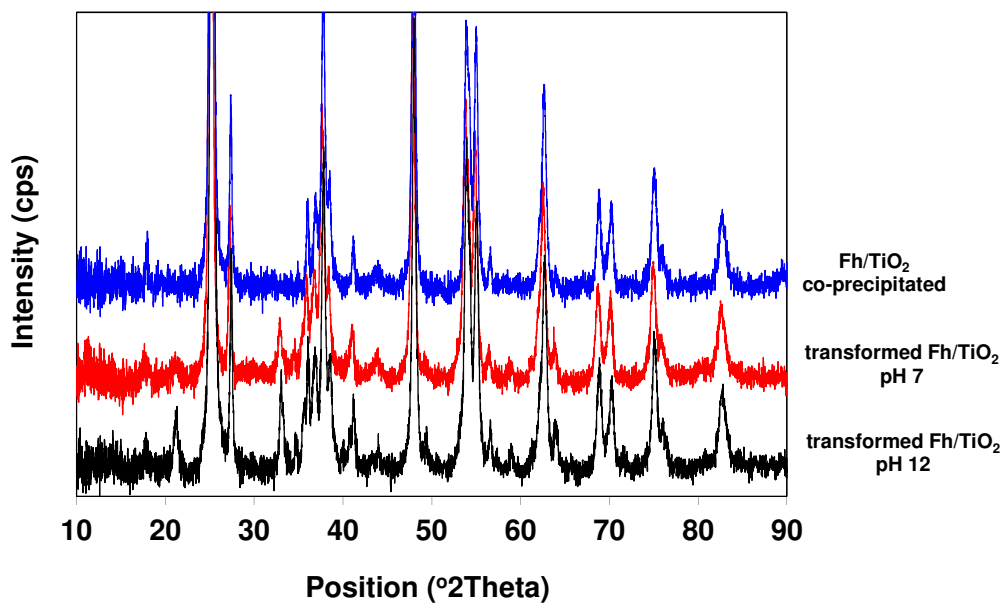

The peaks observed for the ferrihydrite (Fh)/TiO<sub>2</sub> co-precipitated system (blue) are the XRD peaks for TiO<sub>2</sub>. For the transformed Fh/TiO<sub>2</sub> systems, the peak at 21(2 $\theta$ ) is due to goethite and the peak at 33(2 $\theta$ ) is due to hematite. The diffractograms indicate that hematite and goethite are more dominant for the mixed oxide system containing Fh aged at pH 12 (black) compared to the mixed oxide system containing Fh aged at pH 7 (red).

**Figure S4.** Theoretical single scattering phase and amplitude functions of Fe-Fe and Fe-Ti pathways with identical parameters ( $S_0^2 = 1$ ,  $\Delta E = 0$ ,  $\sigma^2 = 0.003$ ,  $R = 3$  Å).

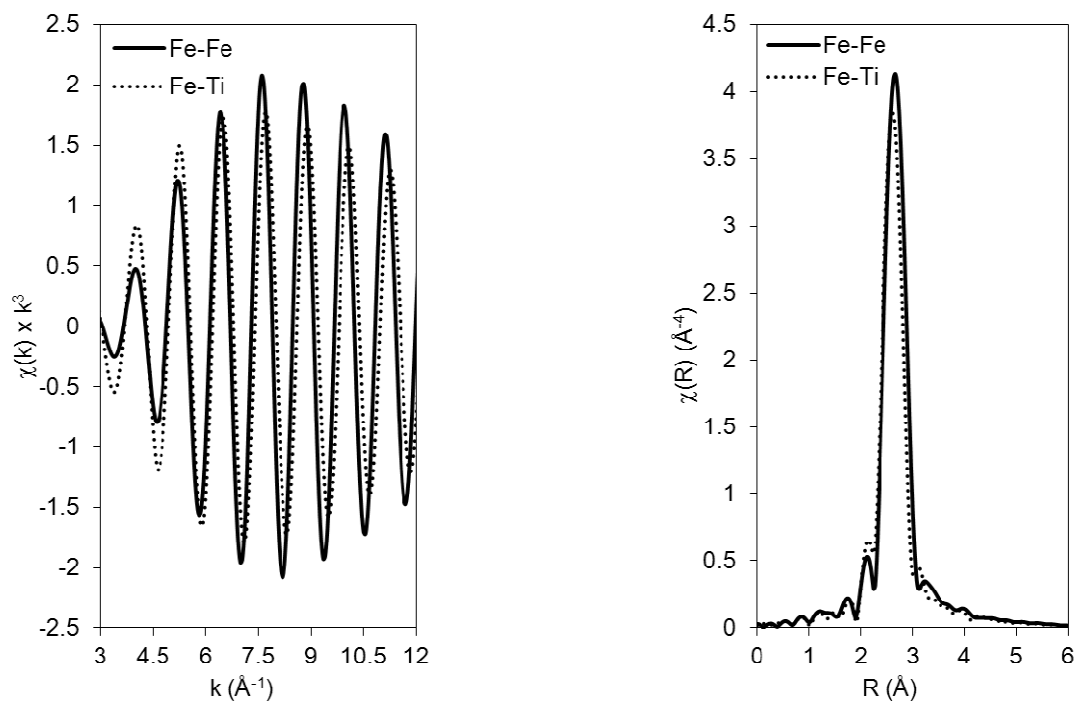

Supplement: Supplementary file 1 [file 4120633]
